# Supplementary material
Source: publisher figshare collection journal article supplement (https://karger.figshare.com/ndownloader/files/13050929)
Supplement: Supplementary file 1 [file 13050929]

| Gene | symbol | Forward (5’-3’) | Reverse (5’-3’) | Products length (bp) |
| --- | --- | --- | --- | --- |
| Glyceraldehyde-3-phosphate dehydrogenase | *Gapdh* | TGAACGGGAAGCTCACTGG | TCCACCACCCTGTTGCTGTA | 306 |
| Hypoxanthine guanine phosphoribosyl transferase | *Hprt* | GCAGTACAGCCCCAAAATGG | AACAAAGTCTGGCCTGTATCCAA | 84 |
| Uncoupling protein 1 | *Ucp1* | AATCAGCTTTGCTTCCCTCA | GCTTTGTGCTTGCATTCTGA | 181 |
| Deiodinase, type 1 | *Dio1* | GAA GTG CAA CGT CTG GGA TT | CTG CCG AAG TTC AAC ACC A | 59 |
| Deiodinase, type 2 | *Dio2* | TCCTGGAGCGTTTCTCCTT | CATAAGCTACGTTGGCATTATTGT | 78 |
| Peroxisome proliferator-activated receptor alpha | *Ppara* | TCACACAATGCAATCCGTTT | GGCCTTGACCTTGTTCATGT | 177 |
| Peroxisome proliferator-activated receptor gamma | *Pparg* | CAGGAAAGACAACAGACAAATCA | GGGGGTGATATGTTTGAACTTG | 95 |
| Peroxisome proliferator-activated receptor gamma, coactivator 1 alpha | *Pgc1a* | CAATGAATGCAGCGGTCTTA | GTGTGAGGAGGGTCATCGTT | 195 |
| Peroxisome proliferator-activated receptor gamma, coactivator 1 beta | *Pgc1b* | AAAAGGCCATCGGTGAAGGT | AGGAGGGCTCATTGCGTTTT | 231 |
| Hormone-sensitive lipase 1 | *Hsl* | CACACAGCATGGATTTACGCA | ACCTGCAAAGACGTTGGACAG | 124 |
| Lipoprotein lipase 1 | *Lpl* | CAAAACAACCAGGCCTTCGA | AGCAATTCCCCGATGTCCA | 140 |
| Adrenergic receptor, beta 3 | *Adrb3* | CTTCCCAGCTAGCCCTGTT | CCTTGCTAGATCTCCATGG | 110 |
| Glucokinase | *Gck* | CAAGCTGCACCCGAGCTT | TGATTCGATGAAGGTGATTTCG | 85 |
| Glucose-6-phosphatase | *G6pase* | CCCATCTGGTTCCACATTCAA | GGCGCTGTCCAAAAAGAATC | 109 |
| Phosphoenolpyruvate carboxykinase 1 | *Pepck* | GTGTCCCCCTTGTCTACGAA | GGTCGTGCATGATGACCTT | 116 |
| Glucose Transporter Type 4 | *Glut4* | GGGCTGTGAGTGAGTGCTTTC | CAGCGAGGCAAGGCTAGA | 150 |
| Farnasoid X receptor (Nr1H4) | *Fxr* | CAAGTGACCTCCACGACCAA | AAGGAACATGGCCTCGACTG | 300 |

**Table S1**. Primers used in qPCR.
